# Supplementary material
Source: publisher figshare collection journal article supplement (https://acs.figshare.com/ndownloader/files/5718108)

## Detection of Scalar Couplings Across NH...OP and OH...OP Hydrogen Bonds in a Flavoprotein

Frank Lohr,<sup>†</sup> Stephen G. Mayhew,<sup>‡</sup> and Heinz Rüterjans<sup>\*,†</sup>

<sup>†</sup> *Institut für Biophysikalische Chemie, Johann Wolfgang Goethe-Universität, 60439 Frankfurt am Main, Germany*

<sup>‡</sup> *Department of Biochemistry, University College Dublin, Belfield, Dublin 4, Ireland*

### Supporting Information

**Figure 1.** Experimental scheme for the quantitative determination of  $^{15}\text{N}$ - $^{31}\text{P}$  scalar couplings. The pulse sequence is derived from the [ $^{15}\text{N}$ ,  $^1\text{H}$ ]-TROSY experiment (Pervushin, K.; Riek, R.; Wider, G.; Wüthrich, K. *Proc. Natl. Acad. Sci. USA* **1997**, *94*, 12366-12371.) and uses gradient  $^{15}\text{N}$  coherence selection combined with sensitivity enhancement as described by Yang and Kay (Yang, D.; Kay, L. E. *J. Biomol. NMR* **1999**, *13*, 3-10.). Narrow and wide bars denote rectangular  $90^\circ$  and  $180^\circ$  pulses, respectively, applied with phase x unless specified. The hatched  $180^\circ$  pulses and gradients were only applied in a control experiment to assess the influence of  $^{15}\text{N}$  chemical shift anisotropy/ $^{31}\text{P}$ - $^{15}\text{N}$  dipole-dipole relaxation interference. RF field strengths (carrier positions) were 18.5 (4.7 ppm), 7.1 (124.7 ppm), and 12.5 kHz (4.96 ppm) for pulses on  $^1\text{H}$ ,  $^{15}\text{N}$ , and  $^{31}\text{P}$ , respectively.  $^{31}\text{P}$  decoupling during acquisition was achieved via a 167 Hz GARP-1 modulation (Shaka, A. J.; Barker, P. B.; Freeman, R. *J. Magn. Reson.* **1985**, *64*, 547-552.). The initial  $90^\circ$  Gaussian shaped pulse of 2.5 ms duration aligns the water magnetization along the positive z axis at the end of the sequence and avoids the saturation of fast exchanging amide protons by pulsed field gradients (Grzesiek, S.; Bax, A. *J. Am. Chem. Soc.* **1993**, *115*, 12593-12594; Matsuo, H.; Kupče, Ě.; Li, H.; Wagner, G. *J. Magn. Reson.*

*Ser. B* 1996, 111, 194-198.). Pulse phases were cycled according to  $\phi_1 = 4(x), 4(-x)$ ;  $\phi_2 = x, -x$ ;  $\phi_3 = 4(x, x, y, y), 4(-x, -x, -y, -y)$ ;  $\phi_4 = 8(x), 8(-x)$ ;  $\phi_5 = x$ ;  $\phi_{\text{receiver}} = R, 2(-R), R$  with  $R = x, 2(-x), x$ . All gradients were sine-bell shaped and had durations of 1 ms ( $G_{1,2,3,4}$ ) or 0.5 ms ( $G_{5,6,7}$ ) with the following directions and approximate strengths at their center  $G_1$ :  $x, 5$  G/cm;  $G_2$ :  $y, 7.5$  G/cm;  $G_3$ :  $y, 5$  G/cm;  $G_4$ :  $xyz, \pm 39.4$  G/cm;  $G_5$ :  $x, 4$  G/cm,  $y, 5.5$  G/cm;  $G_6$ :  $x, 5.5$  G/cm,  $y, 4$  G/cm;  $G_7$ :  $xyz, 8$  G/cm. N- and P-type signals are collected alternately by inverting the direction of  $G_4$  along with pulse phase  $\phi_5$ . Axial peaks are shifted to the edge of the spectrum by incrementing  $\phi_1$  and the receiver phase by  $180^\circ$  for each value of  $t_1$ . The delays  $\tau$  and  $\zeta$  had durations of 2.3 and 0.7 ms, respectively.

The experiment relies on the quantitative  $J$  correlation concept (Bax, A.; Vuister, G. W.; Grzesiek, S.; Delaglio, F.; Wang, A. C.; Tschudin, R.; Zhu, G. *Meth. Enzymol.* 1994, 239, 79-105.) in order to measure the size of scalar  $^{15}\text{N}$ - $^{31}\text{P}$  interactions. Evolution of these heteronuclear couplings during the period  $\Delta$  leads to a build up of  $^{15}\text{N}$  antiphase magnetization with respect to  $^{31}\text{P}$  ( $N_x (1 - 2H_z) P_z$ ) which is selected by phase cycling of the  $90^\circ$  pulses on  $^{31}\text{P}$ . Since no discrimination of  $^{31}\text{P}$  chemical shifts is required the experiment can be carried out in a two-dimensional version without  $^{31}\text{P}$  evolution period, thus providing  $^1\text{H}$ - $^{15}\text{N}$  correlation spectra. Cross peak intensities ( $I_{\text{cross}}$ ) are proportional to  $\sin^2(\pi J_{\text{NP}}\Delta)$ . For a quantitative determination of the desired coupling constants it is necessary to acquire a reference spectrum in which the signal intensity depends in the same way on  $^1\text{H}$  and  $^{15}\text{N}$  relaxation rates and instrumental sensitivity but not on the  $^{15}\text{N}$ - $^{31}\text{P}$  coupling. This was achieved using an identical pulse sequence but omitting the phase-cycling of pulses on  $^{31}\text{P}$  (i.e.  $\phi_1 = 2(x), 2(-x)$ ;  $\phi_2 = x$ ;  $\phi_3 = 2(x, y), 2(-x, -y)$ ;  $\phi_4 = x$ ;  $\phi_5 = x$ ;  $\phi_{\text{receiver}} = x, 2(-x), x$ ), such that  $^{15}\text{N}$  magnetization is maintained

irrespective of whether it is coupled to  $^{31}\text{P}$  or not. Because for small couplings the reference intensities ( $I_{\text{ref}}$ ) are considerably higher than those in the  $^{31}\text{P}$  selected experiment a lower number of scans (NS) can be employed here and the coupling constants can be calculated from the relation  $I_{\text{cross}}/I_{\text{ref}} = (\text{NS}_{\text{cross}}/\text{NS}_{\text{ref}}) \times \sin^2(\pi J_{\text{NP}}\Delta)$ .

If  $180^\circ$  pulses on nitrogens are applied in the center of the  $\Delta$  periods, as indicated by the hatched rectangles, heteronuclear scalar couplings are refocused whereas  $^{15}\text{N}$  chemical shift anisotropy/ $^{31}\text{P}$ - $^{15}\text{N}$  dipole-dipole cross correlated relaxation would still be active, giving rise to  $\text{N}_y (1 - 2\text{H}_z) \text{P}_z$  antiphase magnetization at the time when the first  $90^\circ$  pulse on phosphorus is applied. The absence of detectable cross peaks in a spectrum recorded with the latter version (see Figure 4C) of the pulse sequence suggests that this effect is negligible in the case of flavodoxin.

Supporting Information Figure 1

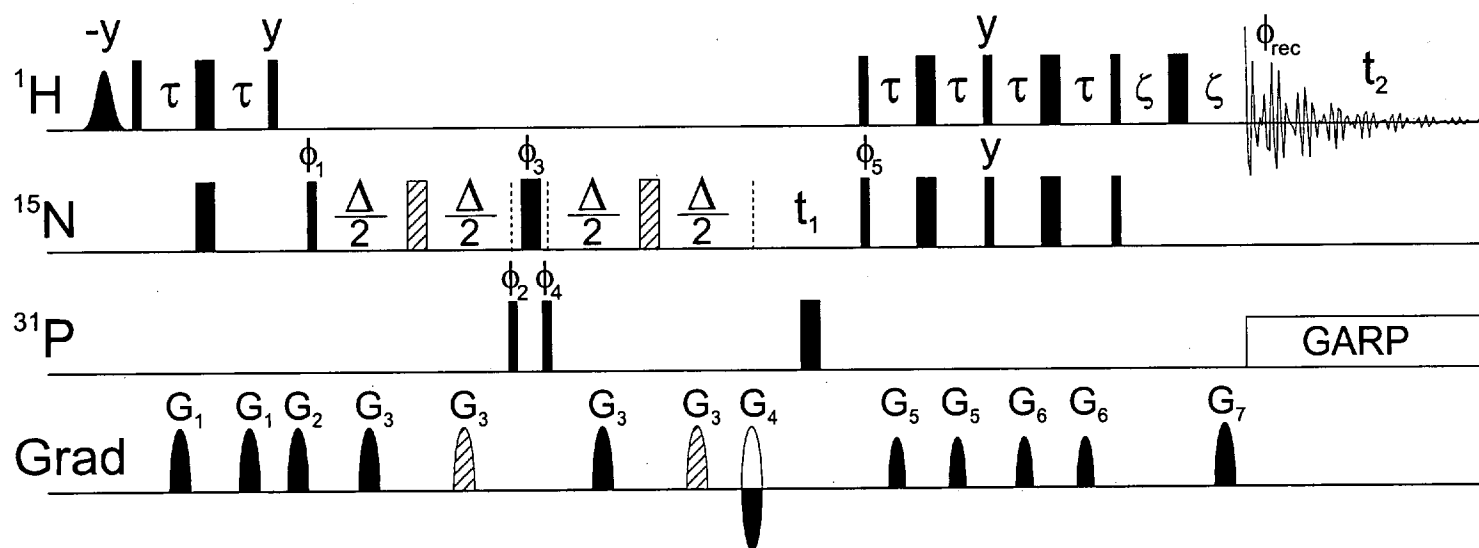

Supplement: Supplementary file 1 [file 5718108]
